# Supplementary material for: Magnetically guided survivin-siRNA delivery and simultaneous dual-modal imaging visualization based on Fe3O4@mTiO2nanospheres for breast cancer
Source: Royal Society of Chemistry journal article supplement (doi:10.1039/c4tb01264j), 2014-01-01
Supplement: c4tb01264j1.pdf [file c4tb01264j1.pdf]

## Supplementary Information

### **Magnetically guided survivin-siRNA delivery and simultaneous dual-modal imaging visualization based on Fe<sub>3</sub>O<sub>4</sub>@mTiO<sub>2</sub> nanospheres for breast cancer**

Jiang Wu<sup>a,1</sup>, Ying Liu<sup>b,1</sup>, Wei Li<sup>c</sup>, Chunyan Wang<sup>b</sup>, Yanjun Li<sup>b</sup>, Ying Tian<sup>b</sup>, Jing Sun<sup>b</sup>, Shouju Wang<sup>b</sup>, Xin Wang<sup>b</sup>, Yuxia Tang<sup>b</sup>, Hong Zhu<sup>a</sup>, Zhaogang Teng<sup>b,\*</sup> and Guangming Lu<sup>b,\*</sup>

<sup>a</sup> *Department of Nuclear Medicine, Jinling Hospital, School of Medicine, Nanjing University, Nanjing 210002, P.R. China*

<sup>b</sup> *Department of Medical Imaging, Jinling Hospital, School of Medicine, Nanjing University, Nanjing 210002, P.R. China*

<sup>c</sup> *Department of Chemistry, Shanghai Key Laboratory of Molecular Catalysis and Innovative Materials, and Laboratory of Advanced Materials, Fudan University, Shanghai 200433, P. R. China*

\* Corresponding author. E-mail address: cjr.luguangming@vip.163.com; tzg@fudan.edu.cn; Fax: +86 25 8480 4659; Tel: +86 25 8086 0185

<sup>1</sup> These two authors contributed equally to this work.

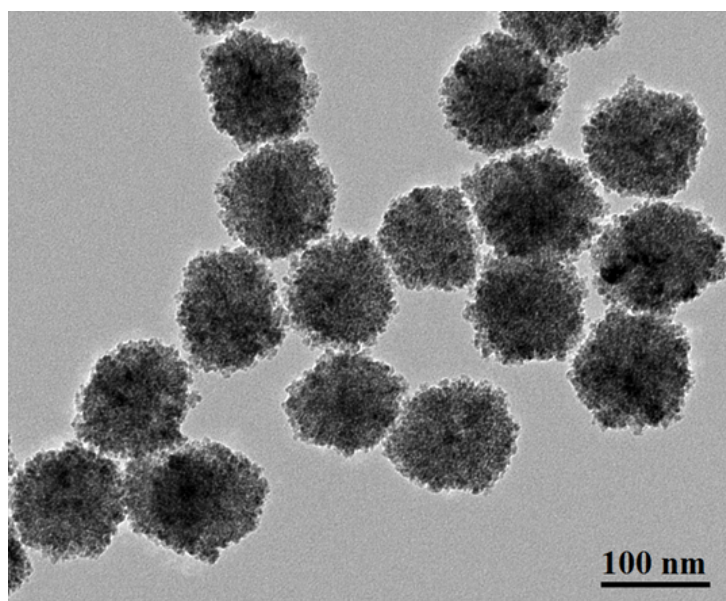

**Fig. S1.** TEM image of the Fe<sub>3</sub>O<sub>4</sub> nanoparticles.

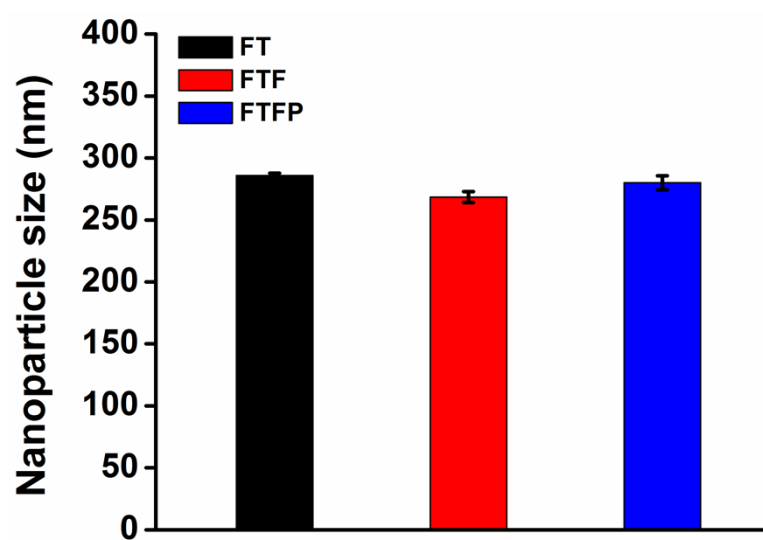

**Fig. S2.** The sizes of FT, FTF, and FTFP nanoparticles measured by DLS.

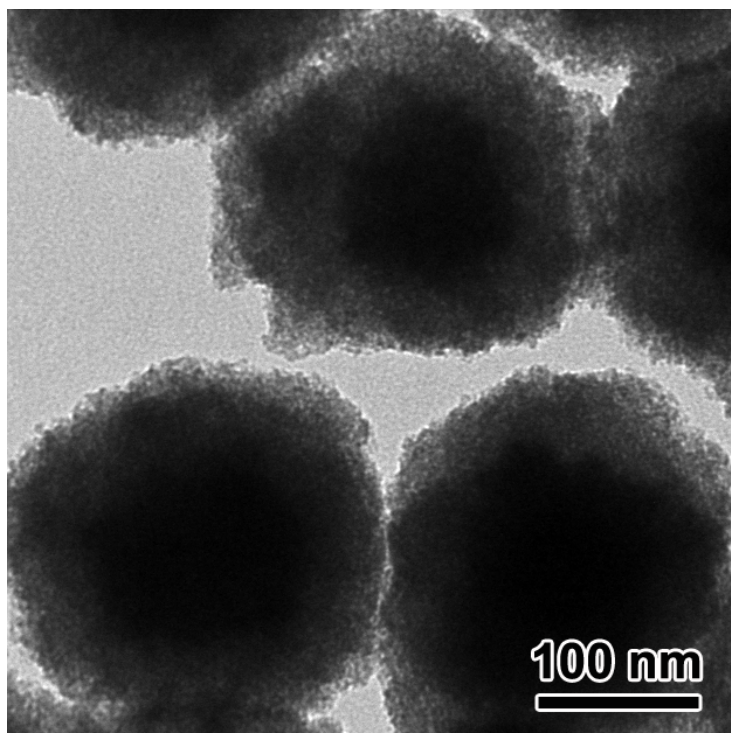

**Fig. S3.** TEM image of the  $\text{Fe}_3\text{O}_4@\text{mTiO}_2/\text{FMN}$  nanoparticles.

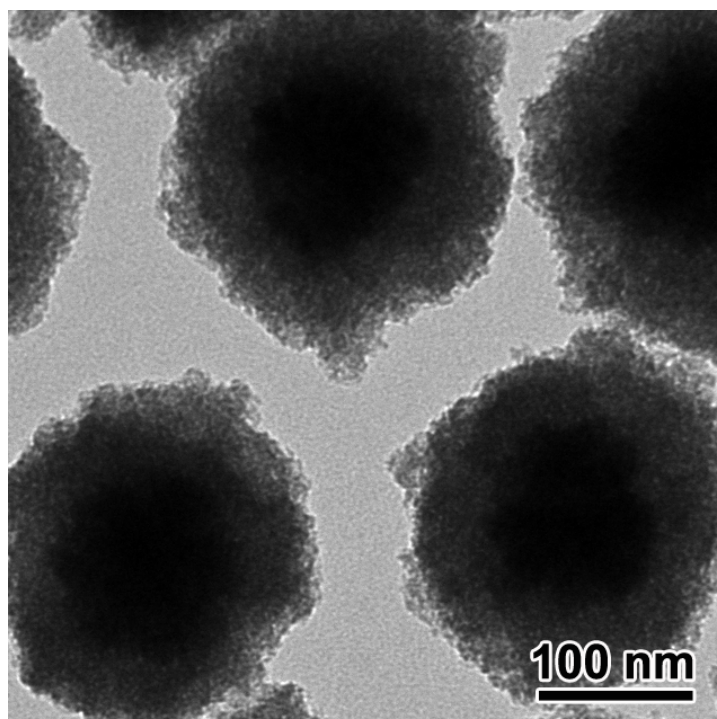

**Fig. S4.** TEM image of the  $\text{Fe}_3\text{O}_4@\text{mTiO}_2/\text{FMN-PEI}$  nanoparticles.

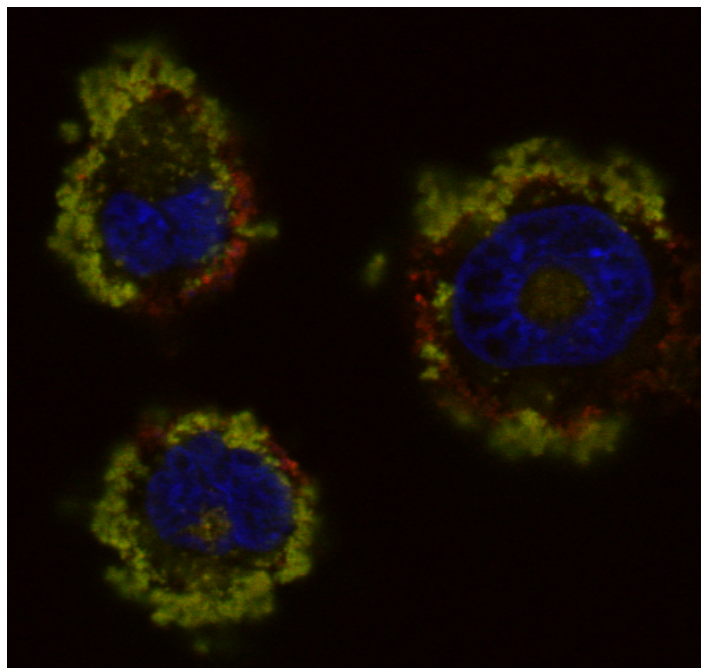

**Fig. S5.** Intracellular FTFP-siRNA distribution and siRNA release from FTFP nanoparticles. Blue color: the nuclei stained with DAPI; Yellow color: the co-localization of FTFP nanoparticles and siRNA; Red color: the released siRNA.
